# Supplementary material
Source: Springer Nature journal article supplement (https://www.springerprofessional.de/resource/supplementary/13638_2012_613_MOESM2_ESM.pdf/11898360)

**a**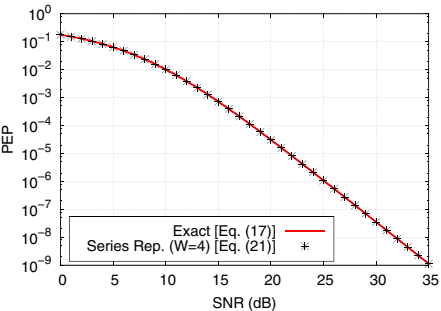
 $\kappa = 0.5, \mu = 1.5.$ 
**b**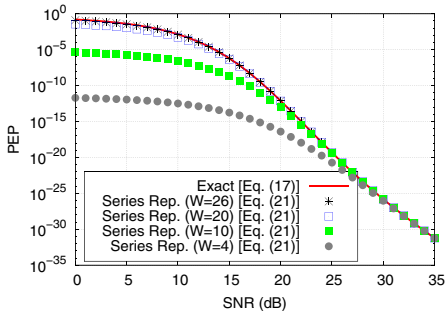
 $\kappa = 4.5, \mu = 4.5.$

Supplement: MOESM2 [file 11898360]
